# Supplementary material
Source: Royal Society of Chemistry journal article supplement (doi:10.1039/d6dt00340k)
Supplement: d6dt00340k1.pdf [file d6dt00340k1.pdf]

# **Type-II Band Alignment and Enhanced Optical Properties in InP/Bi<sub>2</sub>Se<sub>3</sub> van der Waals Heterojunctions: A First- Principles and FDTD Study**

Xinhao Xu<sup>a</sup>, Xin Guo<sup>a,b\*</sup>, Youchun Ma<sup>a,c\*</sup>, Aida Bao<sup>a</sup>, Yayou Wang<sup>a</sup>, Jie Wang<sup>a</sup>,  
Qianxi Jing<sup>a</sup>, Yurou Li<sup>b</sup>, Dongyu Yang<sup>b</sup>, Yajun You<sup>a</sup>, Yongpeng Zhao<sup>d\*</sup> and Pengfei  
Shao<sup>e</sup>

<sup>a</sup> State key Laboratory of Extreme Environment Optoelectronic Dynamic Measurement  
Technology and Instrument, North University of China, Taiyuan, 030051, People's  
Republic of China

<sup>b</sup> Shanxi Province Key Laboratory of Intelligent Detection Technology & Equipment,  
North University of China, Shanxi, 030051, People's Republic of China

<sup>c</sup> National Key Laboratory for Electronic Measurement Technology, North University  
of China, Taiyuan 030051, People's Republic of China

<sup>d</sup> College of Mechanical and Electrical Engineering, Sichuan Agricultural University,  
Ya'an, 625000, People's Republic of China

<sup>e</sup> Jiangsu Provincial Key Laboratory of Advanced Photonic and Electronic Materials,  
School of Electronic Science and Engineering, Nanjing University, 163 Xianlin Road,  
Nanjing, 210093, People's Republic of China

\*E-mail: [guoxin2019@nuc.edu.cn](mailto:guoxin2019@nuc.edu.cn) (X. Guo), [mayouchun@nuc.edu.cn](mailto:mayouchun@nuc.edu.cn) (Y. Ma),  
[zhaoy@sicau.edu.cn](mailto:zhaoy@sicau.edu.cn) (Y. Zhao).

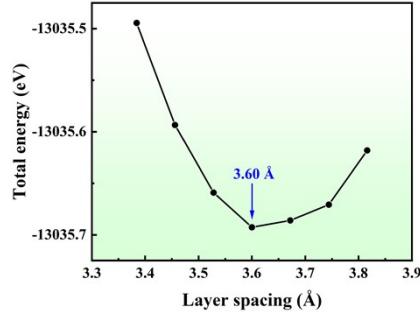

Figure S1 Binding energy curve analysis ( $E_{\text{bind}}(d)$ ) for the H1 configuration, presented as the binding energy as a function of interlayer spacing.

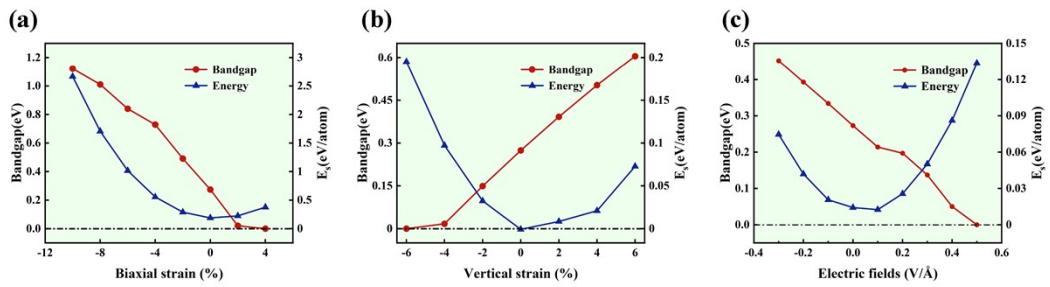

Figure S2 The influence of (a) biaxial strain, (b) vertical strain and (c) electric field on the bandgap and binding energy of the InP/Bi<sub>2</sub>Se<sub>3</sub> vdWH.

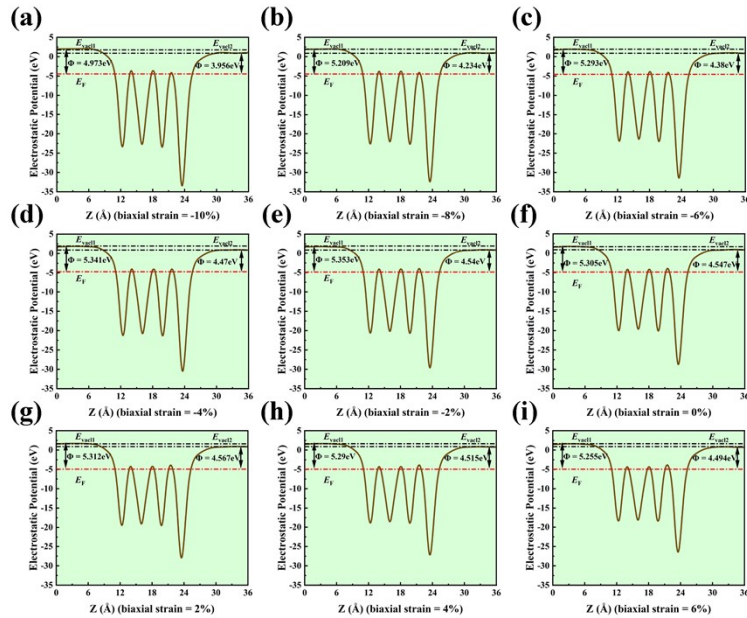

Figure S3 The variation of planar electrostatic potential and work function of the InP/Bi<sub>2</sub>Se<sub>3</sub> vdWH under biaxial strain ranging from -10% to 6%. (The work function is marked on the corresponding graph.)

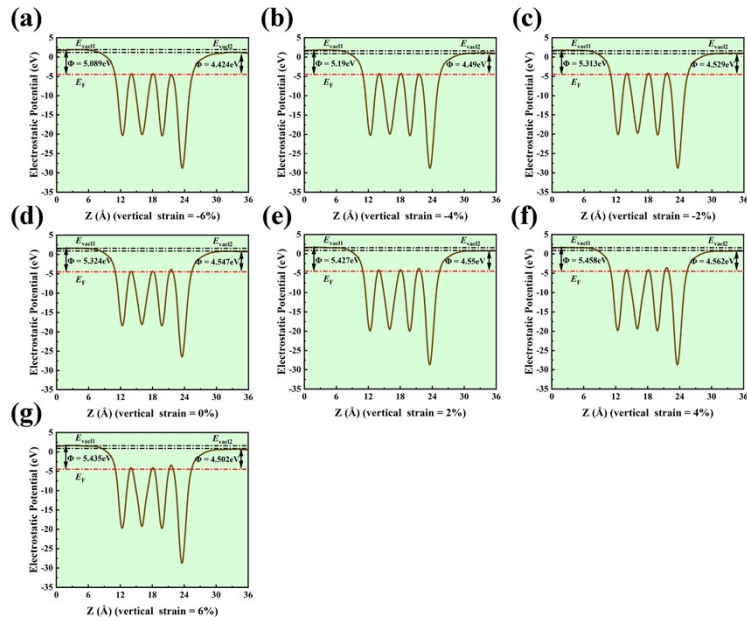

Figure S4 The variation of planar electrostatic potential and work function of the InP/Bi<sub>2</sub>Se<sub>3</sub> vdWH under vertical strain ranging from -6% to 6%. (The work function is marked on the corresponding graph.)

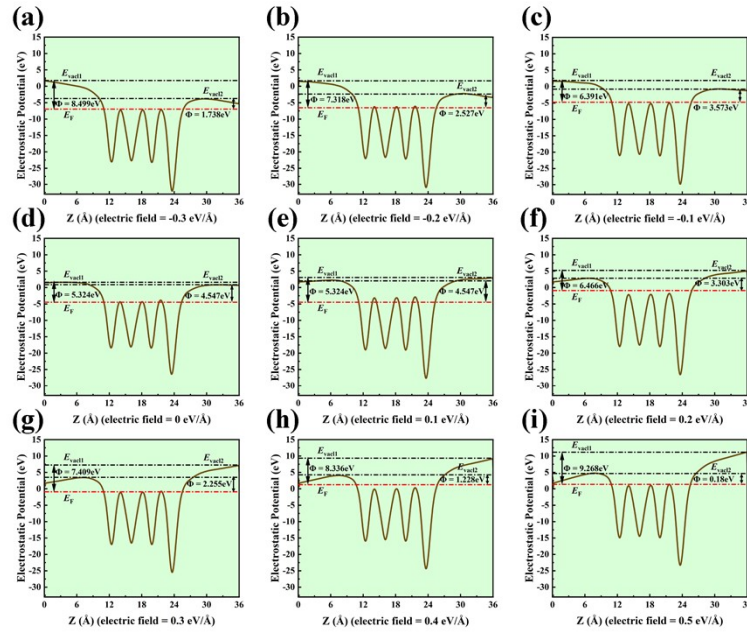

Figure S5 The variation of planar electrostatic potential and work function of the InP/Bi<sub>2</sub>Se<sub>3</sub> vdWH under external electric fields ranging from -0.3 to 0.5 V/Å. (The work function is marked on the corresponding graph.)

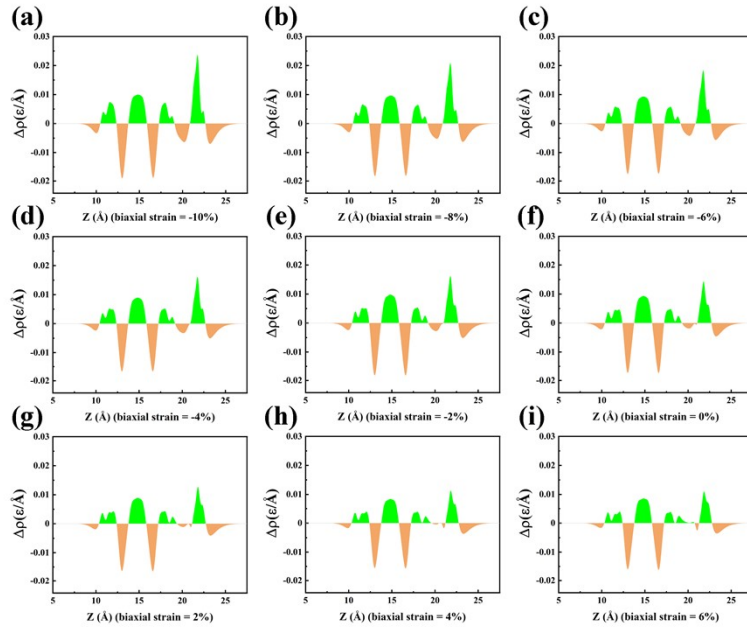

Figure S6 Differential charge density variation of the InP/Bi<sub>2</sub>Se<sub>3</sub> vdWH under biaxial strain ranging from -10% to 6%.

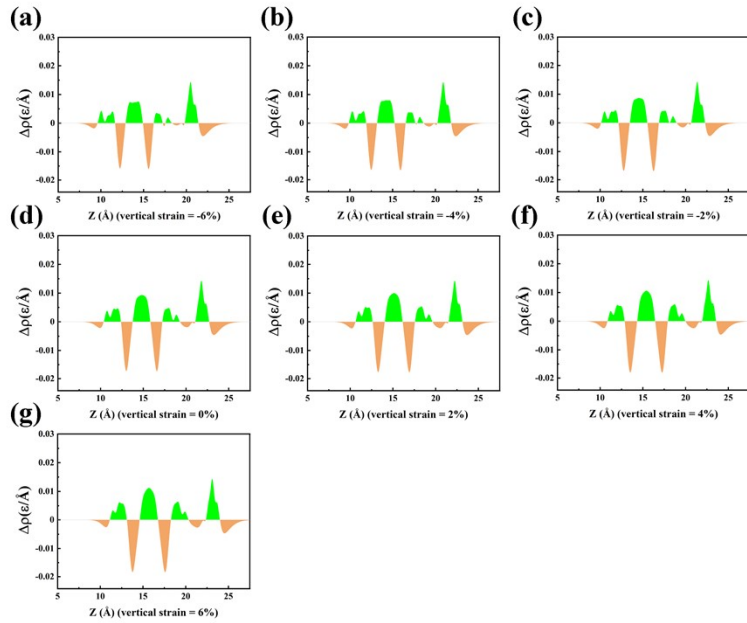

Figure S7 Differential charge density variation of the InP/Bi<sub>2</sub>Se<sub>3</sub> vdWH under vertical strain ranging from -6% to 6%.

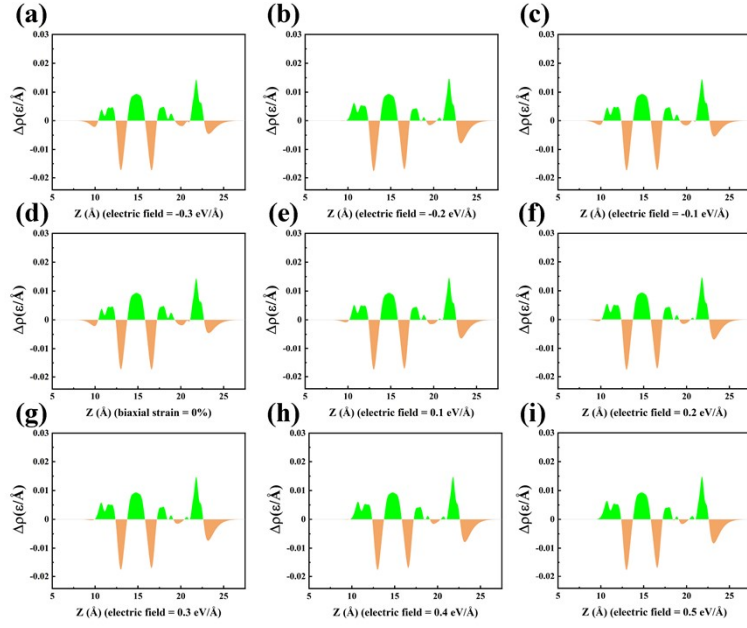

Figure S8 Differential charge density variation of the InP/Bi<sub>2</sub>Se<sub>3</sub> vdWH under external electric fields ranging from -0.3 to 0.5 V/Å.

Table S1 Bader charge analysis of the InP/Bi<sub>2</sub>Se<sub>3</sub> vdWH under different biaxial strains. Positive and negative values indicate electron accumulation and depletion, respectively.

| Species   | 0.90   | 0.92   | 0.94   | 0.96   | 0.98   | 1      | 1.02   | 1.04   | 1.06   |
|-----------|--------|--------|--------|--------|--------|--------|--------|--------|--------|
| <b>Bi</b> | -1.01  | -1.018 | -1.03  | -1.033 | -1.03  | -1.027 | -1.021 | -1.015 | -1.008 |
| <b>Bi</b> | -1.021 | -1.031 | -1.038 | -1.036 | -1.035 | -1.033 | -1.023 | -1.02  | -1.01  |
| <b>Se</b> | 0.621  | 0.625  | 0.627  | 0.628  | 0.627  | 0.625  | 0.626  | 0.623  | 0.62   |
| <b>Se</b> | 0.806  | 0.817  | 0.838  | 0.836  | 0.835  | 0.837  | 0.829  | 0.682  | 0.829  |
| <b>Se</b> | 0.619  | 0.622  | 0.623  | 0.623  | 0.621  | 0.618  | 0.614  | 0.61   | 0.603  |
| <b>In</b> | -0.712 | -0.749 | -0.798 | -0.793 | -0.805 | -0.811 | -0.811 | -0.806 | -0.794 |
| <b>P</b>  | 0.697  | 0.734  | 0.778  | 0.776  | 0.787  | 0.79   | 0.786  | 0.776  | 0.761  |

Table S2 Bader charge analysis of the InP/Bi<sub>2</sub>Se<sub>3</sub> vdWH under different vertical strains. Positive and negative values indicate electron accumulation and depletion, respectively.

| Species   | 0.94   | 0.96   | 0.98   | 1      | 1.02   | 1.04   | 1.06   |
|-----------|--------|--------|--------|--------|--------|--------|--------|
| <b>Bi</b> | -1.04  | -1.038 | -1.032 | -1.028 | -1.021 | -1.016 | -1.011 |
| <b>Bi</b> | -1.046 | -1.042 | -1.038 | -1.033 | -1.027 | -1.021 | -1.011 |
